# Supplementary material for: Overfishing and nutrient pollution interact with temperature to disrupt coral reefs down to microbial scales
Source: PubMed Central journal article supplement (PMC4899628; doi:10.1038/ncomms11833), 2016-06-07
Supplement: ncomms11833-s1.pdf [file ncomms11833-s1.pdf]

1

## Supplementary Information

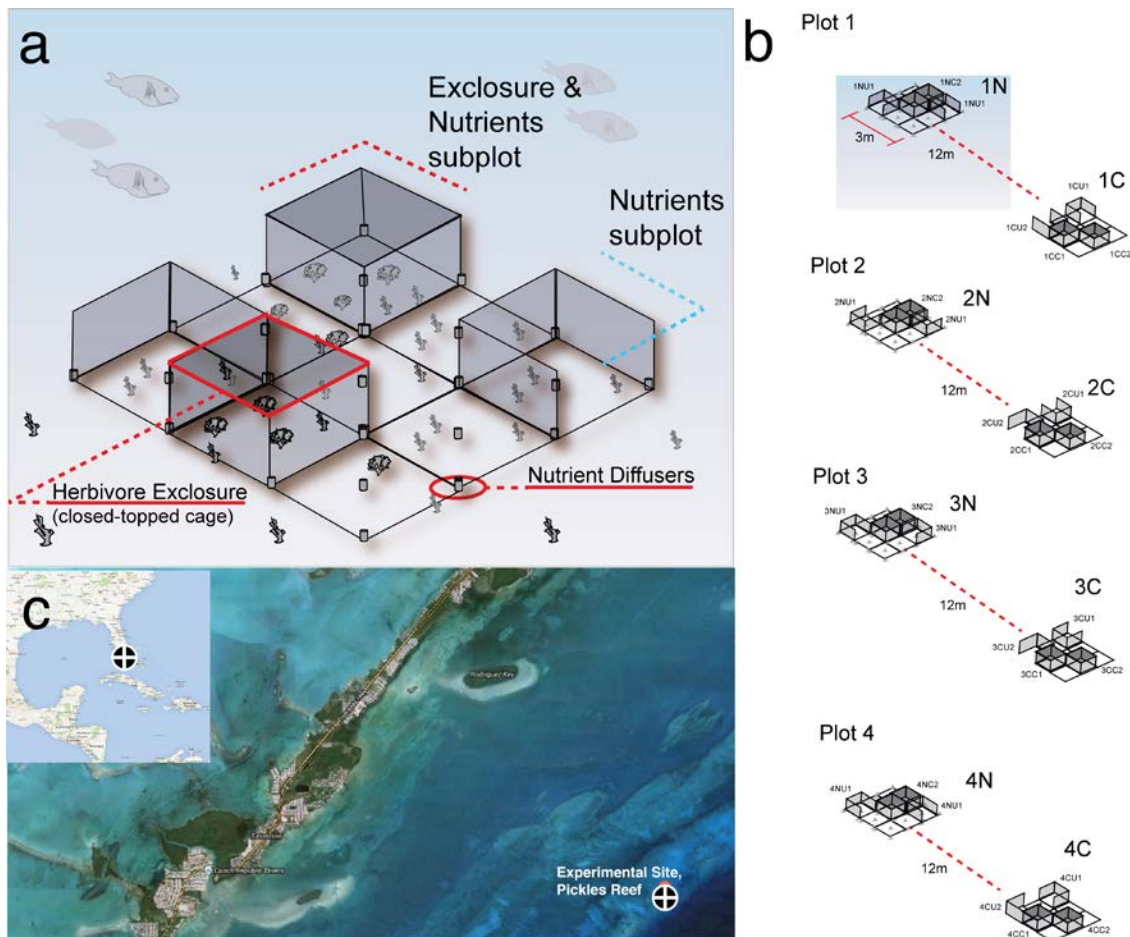

2

### 3 Supplementary Figure 1. Experimental setup.

4 In order to simulate the effects of overfishing and/or nutrient pollution, 3 m x 3 m (9 m<sup>2</sup>)  
 5 experimental plots were created to exclude herbivores nested within control or nutrient-  
 6 enriched areas. **a**, Arrangement of each plot. Each 9 m<sup>2</sup> plot was delineated into 1 m<sup>2</sup>  
 7 plots with metal nails driven into the reef at the corners and center of each plot. Within  
 8 each 9 m<sup>2</sup> plot, we nested two 1 m<sup>2</sup> herbivore exlosures and two 1 m<sup>2</sup> enclosure controls  
 9 (three-sided, open-topped partial exlosures, to control for experimental artifacts). All  
 10 exlosures were made of plastic-coated wire mesh with 2.5 cm diameter holes. This mesh  
 11 diameter excludes all herbivorous fishes >10 cm total length, but allows in smaller  
 12 juvenile herbivorous fishes. Exlosures and enclosure controls were constructed within  
 13 each 9 m<sup>2</sup> plot so as to maximize similarity in initial algal abundance, community  
 14 structure, and rugosity. For the enrichment treatment, Osmocote<sup>®</sup> (19-6-12, N-P-K) slow-  
 15 release garden fertilizer was placed in 15 cm diameter PVC tubes with 10, 1.5 cm holes.  
 16 These enrichment tubes were attached to each metal nail within the 9 m<sup>2</sup> enrichment plots  
 17 for a total of 25 enrichment tubes per enrichment plot. Nutrient diffusers were replaced  
 18 every 30-40 days to ensure continued delivery of N and P. **b**, Arrangement of plots in  
 19 experiment. Eight of these 9 m<sup>2</sup> plots were constructed, four enriched with nitrogen and  
 20 phosphorous (N) and four left at ambient levels of nutrient loading to act as control plots

21 (C). These plots were developed and maintained for ~3 years near Pickles Reef (N  
22 24.99430, W 080.40650). The plot enlarged in panel **a** is shaded in blue in panel **b** in  
23 order to show its relationship to the rest of the experiment. Plots are not drawn to scale. **c**,  
24 Map of the experimental site. Pickles Reef is a 5-6 m deep spur and groove reef system  
25 located just east of Key Largo, Florida, USA, and is representative of coral depauperate  
26 habitats common in South Florida. Map data are from Google Maps 2012-2014 and  
27 partner INEGI.  
28

a

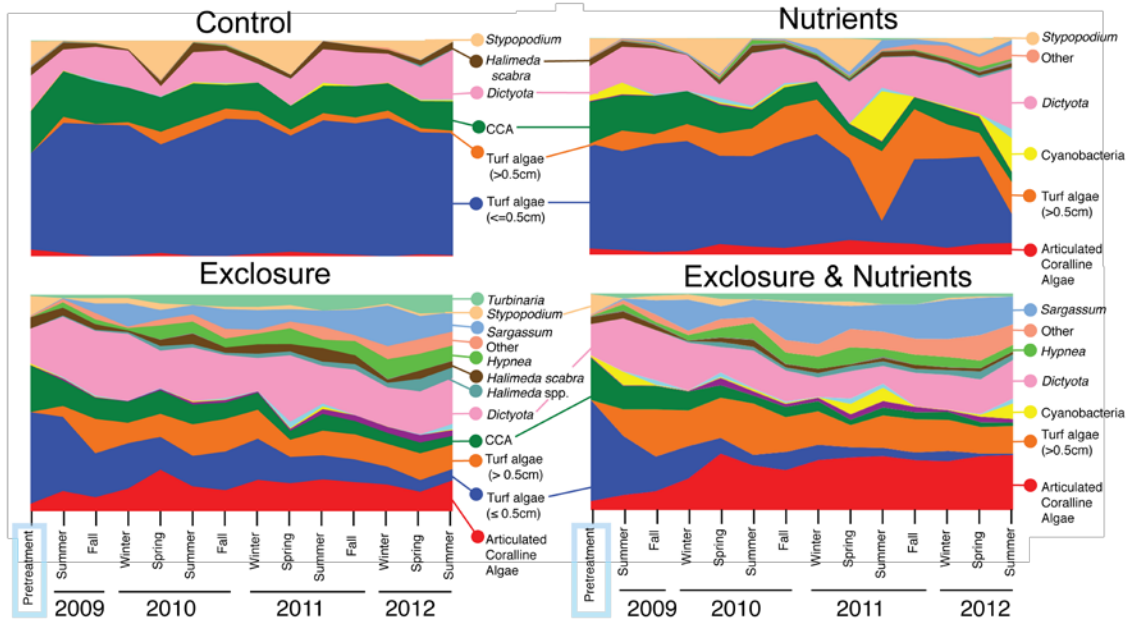

b

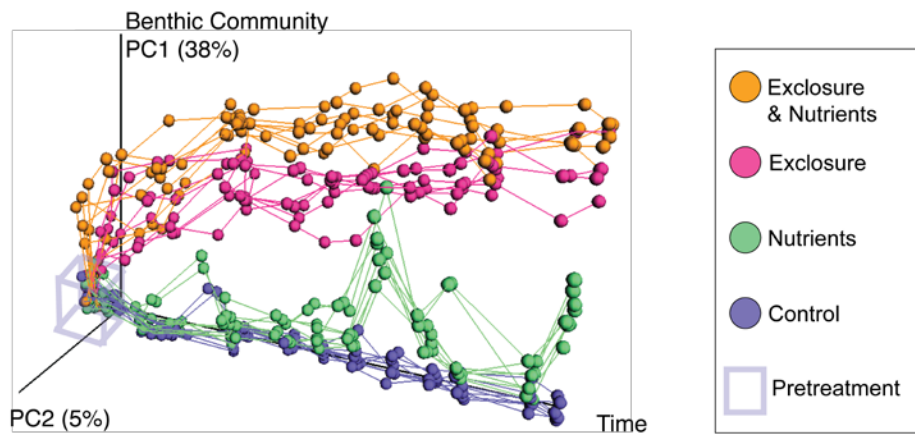

29

30 **Supplementary Figure 2. Treatments alter algal community composition over time.**  
31 **a**, Algal abundance over time. Relative cover of each algal taxon or functional group  
32 surveyed over time (see also Supplementary Data 1a,b). Cover is normalized to 100% for  
33 visual clarity (see Figure 1a for overall changes in absolute cover). CCA, crustose  
34 coralline algae. Most algal types responded significantly to exclusion of herbivores or  
35 nutrient loading (see Supplementary Data 1c for mixed-effects model results). **b**, Algal  
36 community change. Change in algal communities over time is summarized as a PCoA  
37 plot of Bray-Curtis divergences between all algal communities exposed to each treatment  
38 (the first two PCoA axes are plotted against time). Treatment significantly altered overall  
39 community composition (PERMANOVA, 1000 iterations, pseudo-F = 97.11,  $p = 0.001$ ).  
40 Colors represent treatments; the wireframe box surrounds pretreatment communities.

41  
42

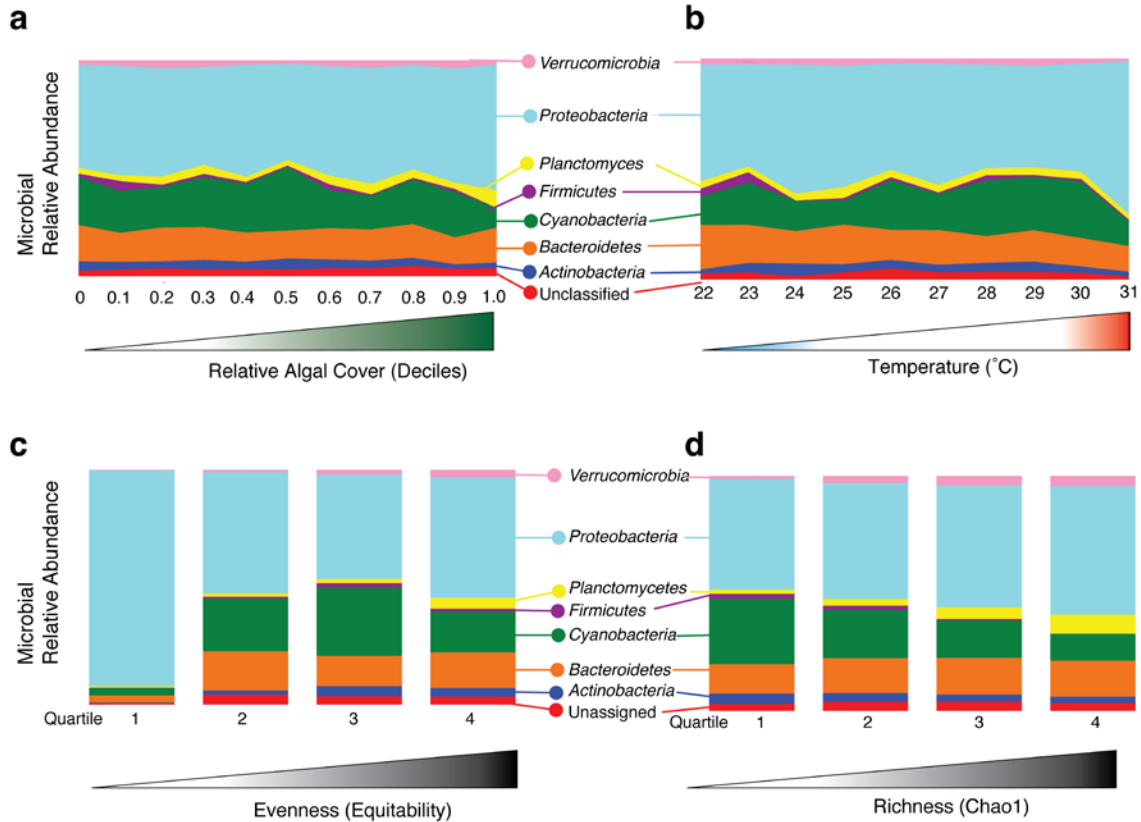

43

44 **Supplementary Figure 3. Microbial phyla in the coral surface microbiome are**  
 45 **altered by algal competition, temperature extremes, microbial community evenness,**  
 46 **and microbial community richness.**

47 **a-d,** Abundance of microbial phyla. Plots display microbial relative abundance in the  
 48 coral surface mucus layer as a function of deciles of upright algal cover (macroalgae, turf  
 49 algae, and cyanobacteria), temperature, quartiles of microbial community richness, or  
 50 quartiles of microbial community evenness. Minor phyla (<1% average relative  
 51 abundance) are not shown, and only samples with associated temperature or algal  
 52 metadata are included (n = 435 samples). Significance was assessed by Spearman  
 53 correlation and a permutational significance test, and multiple comparisons addressed  
 54 with an FDR q-value threshold of 0.05 (Supplementary Data 3b). **a,** Increasing levels of  
 55 upright algal cover significantly reduced the abundance of *Actinobacteria*,  
 56 *Cyanobacteria*, *Bacteroidetes*. In contrast, *Planctomyces* and Unclassified bacteria  
 57 increased in abundance as algal cover increased. Elevated temperatures significantly  
 58 reduced the abundance of *Actinobacteria*, Unassigned microbes, *Bacteroidetes*, and  
 59 *Firmicutes* (Supplementary Table 3c). **b,** In some cases, taxa appeared to respond to  
 60 temperature extremes rather than temperature *per se*. This was quantified by regressing  
 61 microbial abundance against the squared deviation of temperature from 28 °C  
 62 (Supplementary Table 3d). *Proteobacteria* significantly increased at temperature  
 63 extremes by this measure, while *Cyanobacteria* decreased. For panels **c** and **d**, all phyla  
 64 with >1% average abundance were tested for differences in abundance in microbial  
 65 communities with varying evenness and richness. All phyla tested significantly differed  
 66 in abundance across quartiles of evenness and richness (Kruskal-Wallis test,  $p < 0.05$ ,

67 FDR  $q < 0.05$ ). *Proteobacteria* accounted for 91.9% of the least even communities (1<sup>st</sup>  
68 quartile of evenness). In contrast *Proteobacteria* made up only 44-52% of communities  
69 in the 2<sup>nd</sup>, 3<sup>rd</sup>, and 4<sup>th</sup> quartiles of evenness, where *Cyanobacteria* were more abundant.  
70 More taxonomically rich communities had significantly fewer *Cyanobacteria* (the richest  
71 quartile was 10.7% *Cyanobacteria*; the least rich 24.0%) and *Actinobacteria* (2.7% in the  
72 most rich quartile vs. 4.0% in the least rich quartile) but more *Proteobacteria* (52.7% vs.  
73 46.4%), *Bacteroidetes* (14.7% vs. 13.1%) and *Planctomyces* (7.6% vs. 1.8%).  
74

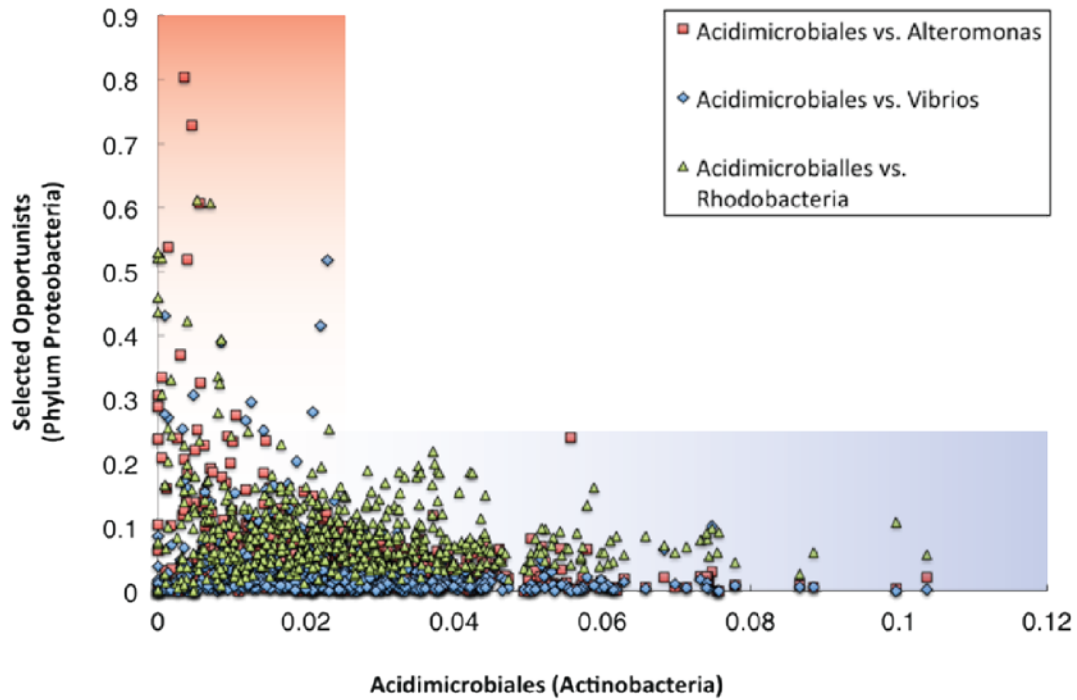

75

76 **Supplementary Figure 4. Actinobacteria and blooms of opportunists in the coral**  
 77 **mucus microbiome.**

78 Each point represents a single 16S rRNA sample from coral mucus. Coordinates plot the  
 79 abundance of *Acidimicrobiales* (Actinobacteria) on the x-axis vs. the relative abundance  
 80 of *Alteromonadales*, *Vibrionales*, or *Rhodobacterales* on the y-axis. Outbreaks of these  
 81 opportunists to abundances above 25% of the community (horizontal blue gradient) were  
 82 not observed when *Acidimicrobiales* were present at >2.5% abundance. Reductions of  
 83 *Acidimicrobiales* below ~2.5% appear to allow blooms of *Vibrionales*, *Rhodobacterales*,  
 84 and *Alteromonadales* opportunists that rose as high as 80% of total community  
 85 composition (vertical red gradient). See Supplementary Data 3e for data on  
 86 environmental conditions favoring dominance by specific groups.

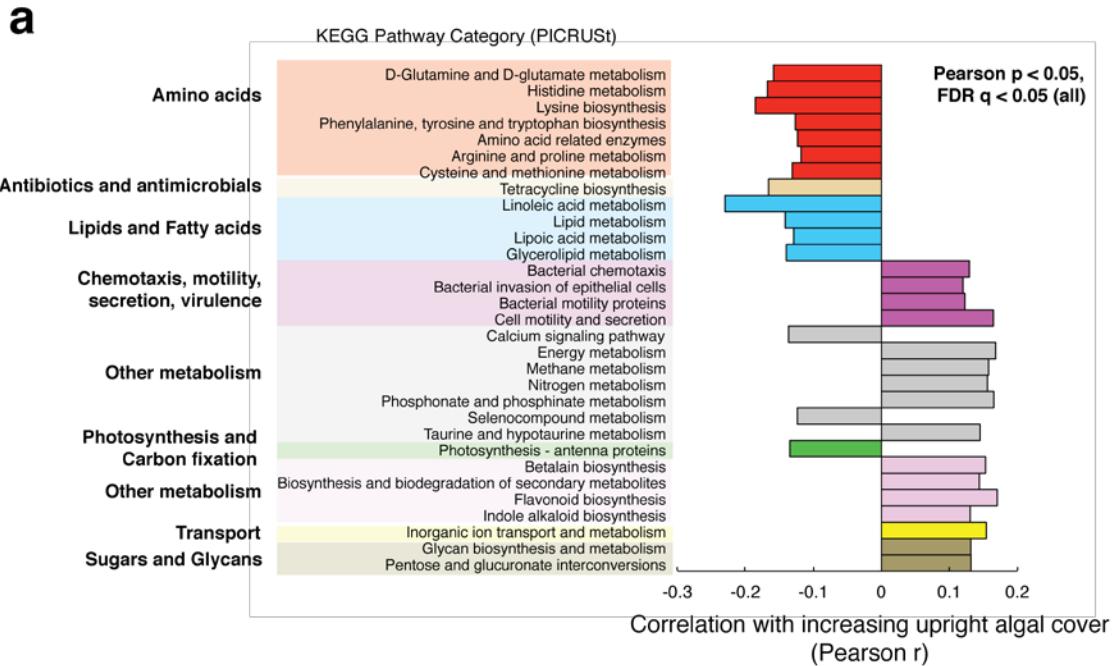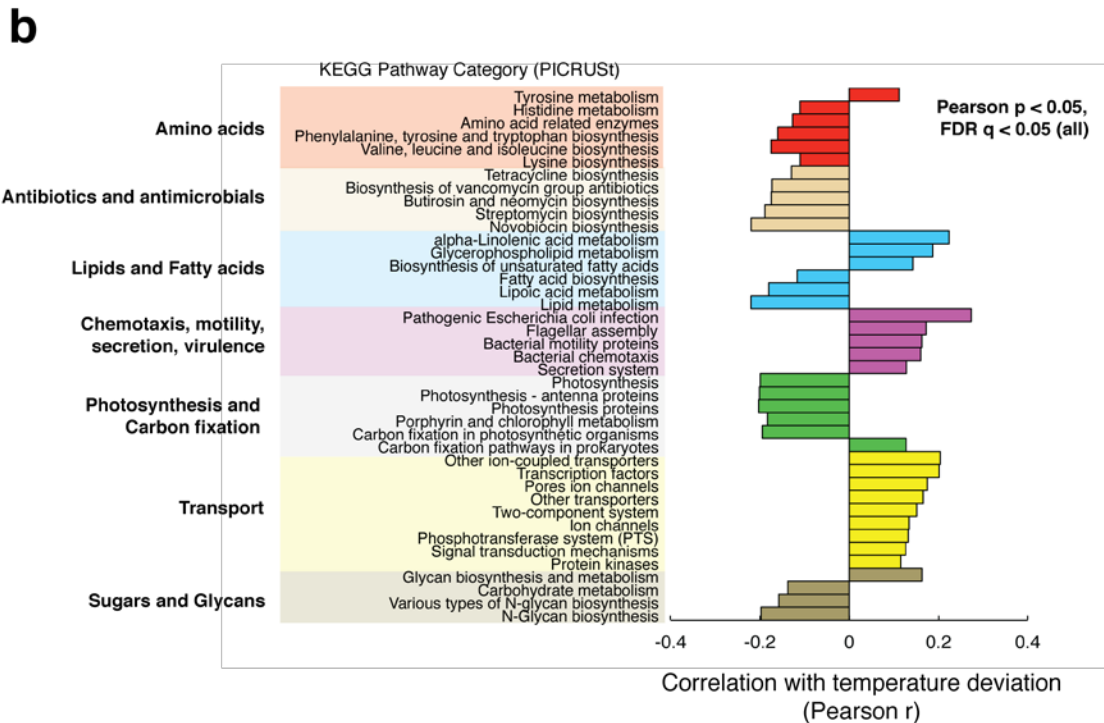

87

88 **Supplementary Figure 5. PICRUSt predicted changes in coral microbiome gene**  
 89 **function correlated with increasing upright algal cover or temperature extremes.**

90 **a-b**, Predicted microbial functions. Functional profiles (KEGG orthology groups) for  
 91 each sample were imputed based on comparison of microbial community composition  
 92 with sequenced bacteria and archaea in the PICRUSt software package. These profiles  
 93 were summarized into KEGG categories. Selected KEGG categories that showed



94 significant positive or negative correlations (Pearson correlation, FDR  $q < 0.05$ ) with  
95 increasing upright algal cover (panel **a**) or temperature extremes (panel **b**) are shown.  
96 Temperature extremes were calculated as the mean squared deviation from 28 °C , a non-  
97 stressful temperature that reflected the mean temperature across samples (this also  
98 approximated the overall annual average at the site). For the full set of categories  
99 significantly correlated with upright algal cover or temperature extremes, see  
100 Supplementary Data 4a,b.  
101

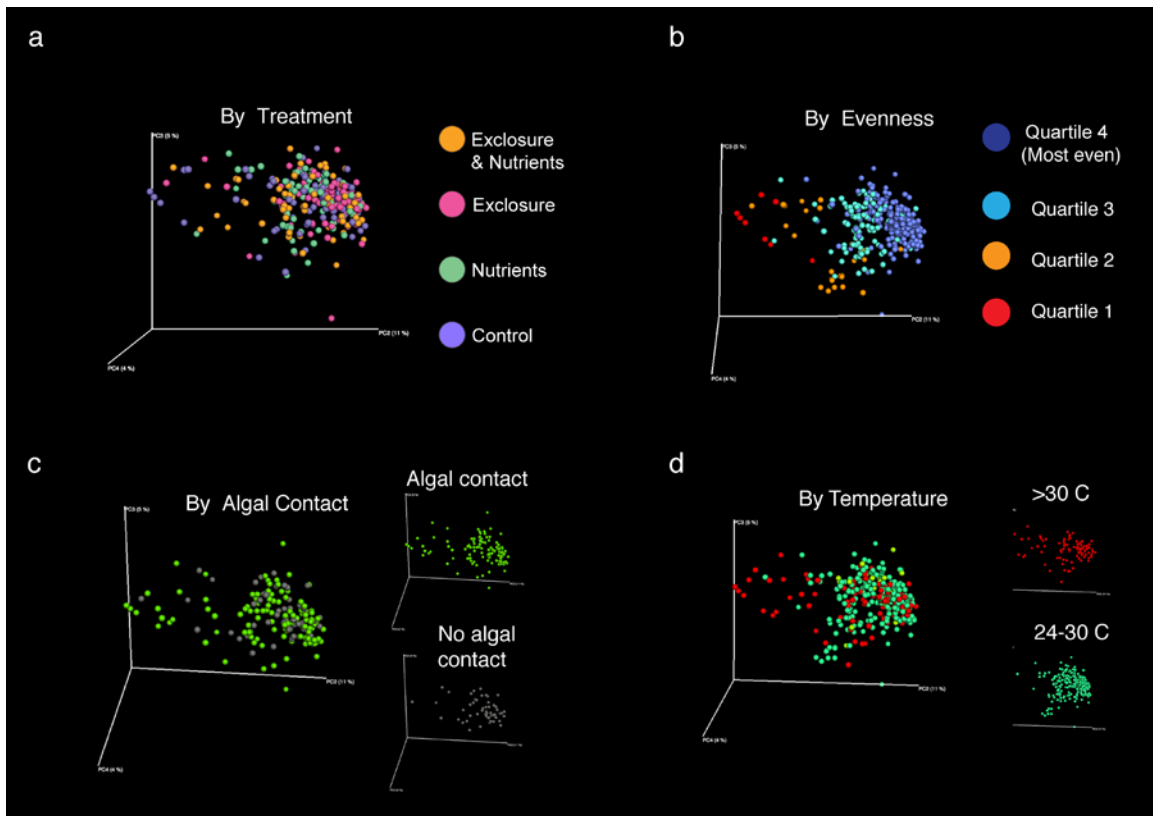

102  
 103  
 104  
 105  
 106  
 107  
 108  
 109  
 110  
 111  
 112  
 113  
 114  
 115  
 116  
 117  
 118  
 119  
 120

**Supplementary Figure 6.  $\beta$ -diversity of coral microbiomes relative to treatment, evenness, algal competition, or thermal stress.**

**a-d**, PCoA plots of coral mucus microbiome  $\beta$ -diversity using Weighted UniFrac distances between 16S rRNA gene amplicon libraries, showing PC axes 2,3 and 4 (PC 1, which captures differences between *Synechococcus* and *Proteobacteria* dominated communities is shown in Fig. 2). The plots are colored by treatment (panel **a**), microbial community evenness (panel **b**) algal contact (panel **c**), or temperature (panel **d**). Points representing samples where a metadata classification was unavailable were excluded from plots, for example in cases where coral-algal contact could not be assessed. Subpanels reproduce main plots, but separated by selected metadata categories. Evenness in panel **b** represents quartiles of microbial community equitability. While no clustering by treatment was observed in panel **a**, microbial  $\beta$ -diversity was significantly higher in corals contacting algae than in those that did not (non-parametric t-test on Weighted UniFrac distances,  $p = 0.001$ ) in panel **c**, and in panel **d** corals at high temperatures ( $>30$  °C;  $p = 0.001$ ) or low temperatures ( $<24$  °C;  $p = 0.002$ , not shown) had higher microbial  $\beta$ -diversity relative to samples collected when sea surface temperatures were between 24-30 °C. Thus, interactions with algae and temperature extremes increase  $\beta$ -diversity in coral microbiomes.

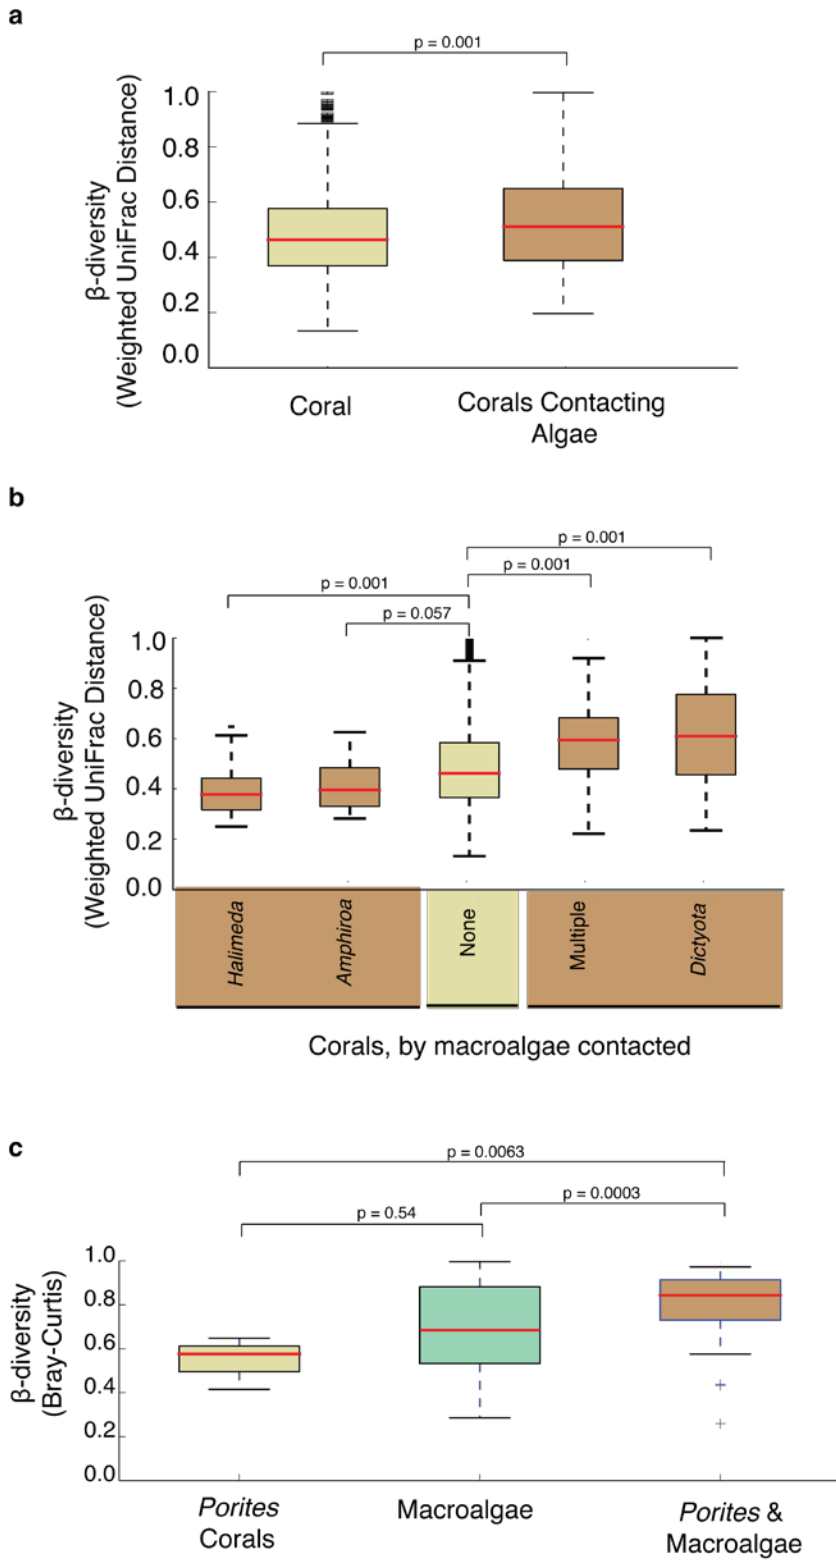

121

122 **Supplementary Figure 7. Coral microbiome  $\beta$ -diversity as a function of competition**  
 123 **with macroalgae.**

124 **a-b**, Effects of algal competition on coral microbiome  $\beta$ -diversity in this experiment are  
125 shown for all macroalgal contacts (panel a) and contact with prevalent macroalgal genera  
126 (panel b). All microbial distances are Weighted UniFrac distances. Overall, contact with  
127 macroalgae increased microbial beta-diversity (non-parametric t-test, 1000 replicates,  $p =$   
128 0.001). When split into categories by macroalgal genera, large significant increases in  
129 microbial variability were observed in corals contacting *Dictyota* algae (non-parametric t-  
130 test, 1000 replicates,  $p = 0.001$ ) or multiple types of macroalgae ( $p = 0.001$ ). In contrast,  
131 competition with *Amphiroa* algae marginally reduced  $\beta$ -diversity ( $p = 0.057$ ) while corals  
132 in competition with *Halimeda* showed significantly reduced  $\beta$ -diversity ( $p = 0.001$ ). **c**,  
133 Data on microbial  $\beta$ -diversity caused by algal contact based on a re-analysis of Vega  
134 Thurber *et al.*, 2012<sup>23</sup>. In that experiment, samples were collected from macroalgae,  
135 *Porites astreoides* corals alone, or *P. astreoides* placed in direct competition with  
136 macroalgae. Box plots show  $\beta$ -diversity of corals, algae, or corals in competition with  
137 algae. Algal contact significantly increases coral microbiome  $\beta$ -diversity above that of  
138 either coral alone or algae alone. P-values reflect Bonferroni-corrected permutational t-  
139 tests of Bray-Curtis distances between samples. Bray-Curtis distances were used here as  
140 measures of  $\beta$ -diversity because Weighted UniFrac could not be calculated for T-RFLP  
141 data.

142

143

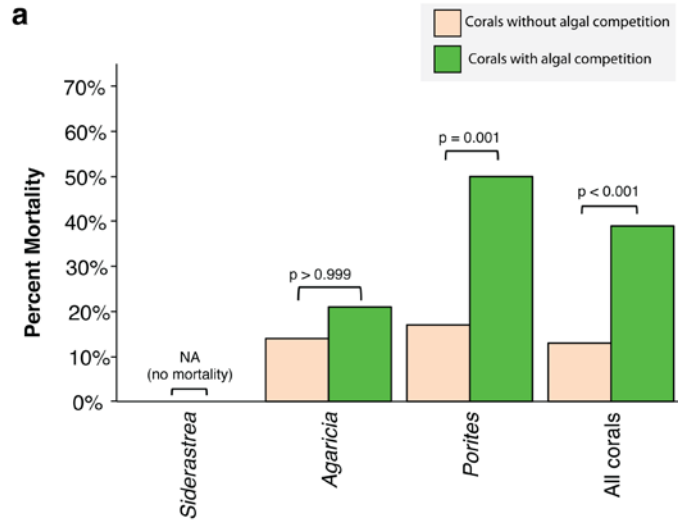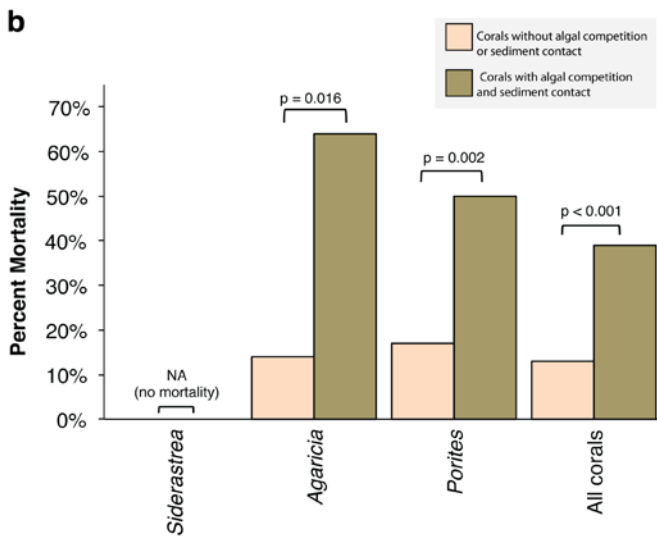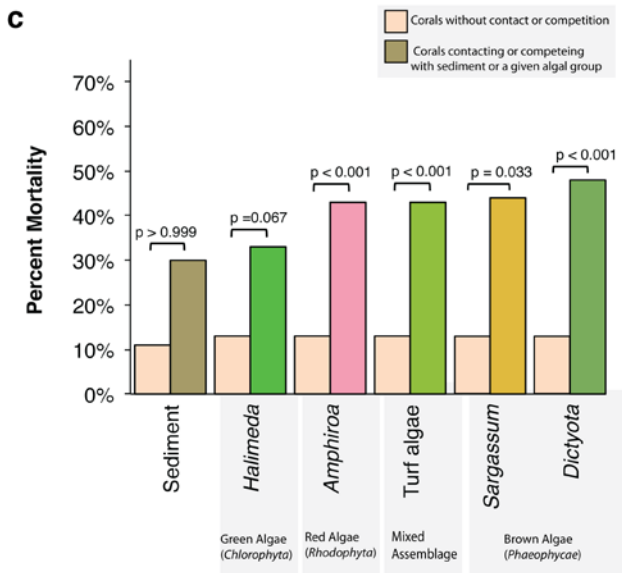

145 **Supplementary Figure 8. Coral mortality as a function of contact with algae or**  
146 **sediment.**

147 Panels show the percentage of corals that died over the course of the experiment as a  
148 function of contact with sediment or different types of algae. **a**, Coral mortality by coral  
149 genus over the course of the experiment as a function of algal contact. *Porites* corals  
150 showed significantly elevated mortality with algal contact, while *Agaricia* corals showed  
151 a similar pattern but no significant difference. *Siderastrea* corals suffered no mortality  
152 regardless of algal contact. **b**, coral mortality by coral genus over the course of the  
153 experiment as a function of algal and sediment contact. *Agaricia* corals showed greater  
154 susceptibility to the combination of sediment and algae than to algae alone. In most cases,  
155 competition with algae or contact with sediment increased coral mortality. **c**, coral  
156 mortality subdivided by algae contacted. In some cases, corals contacted more than one  
157 type of algae or algae and sediment making these categories not mutually exclusive.  
158 Many algal taxa did not contact corals frequently enough for meaningful statistics (e.g.  
159 cyanobacteria, *Styopodium zonale*). P-values reflect Fisher's Exact Test.  
160

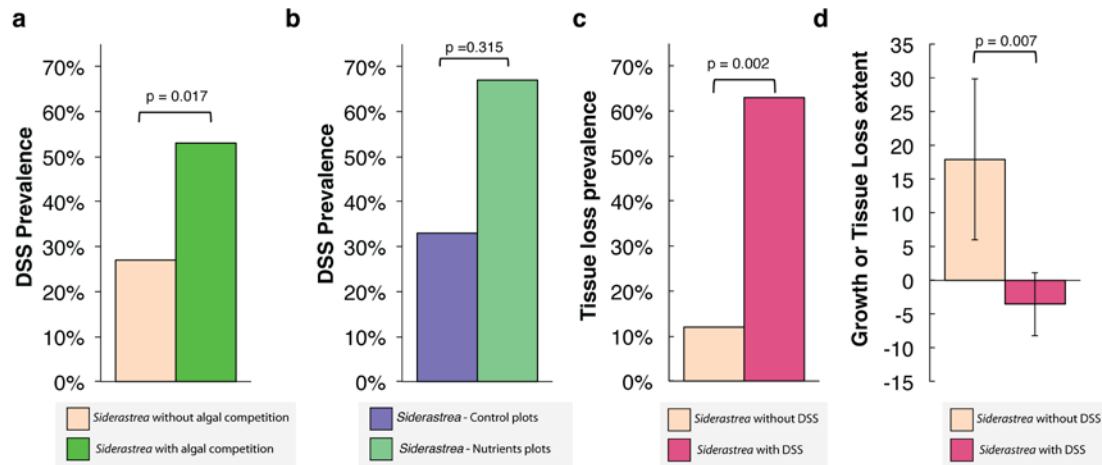

161

162 **Supplementary Figure 9. Dark Spot Syndrome in *Siderastrea* corals increases with**  
 163 **algal contact and is associated with increased prevalence and extent of tissue loss.**

164 **a**, Prevalence of Dark Spot Syndrome (DSS) across *Siderastrea siderea* corals contacting  
 165 or not contacting algae. Algal contact increases the prevalence of DSS. **b**, Prevalence of  
 166 DSS in Control vs. Nutrient Enriched plots. Nutrient enrichment did not significantly  
 167 increase DSS as we had shown in Vega Thurber *et al.* (2014), although the pattern is the  
 168 same as in our previous study. These data reflect only corals within the plots themselves.  
 169 Our previous work showed similar and highly significant increases in the prevalence of  
 170 DSS in radial surveys around the same enriched plots studied here that included 3-4 times  
 171 more corals than within these plots. Thus, the lack of significance within plots may  
 172 reflect the lower number of *Siderastrea* corals within plots than in radial surveys around  
 173 the plots as in <sup>7</sup>. **c**, Tissue loss prevalence in *Siderastrea* corals with or without DSS.  
 174 Corals with visible DSS were more likely to lose tissue. **d**, Average extent of growth  
 175 (positive numbers) or tissue loss (negative numbers) in corals with or without DSS.  
 176 While *Siderastrea* without DSS gained tissue on average, those with DSS lost tissue.  
 177 Statistics are from Fisher's exact test **a-c** or ANOVA **d**.

178

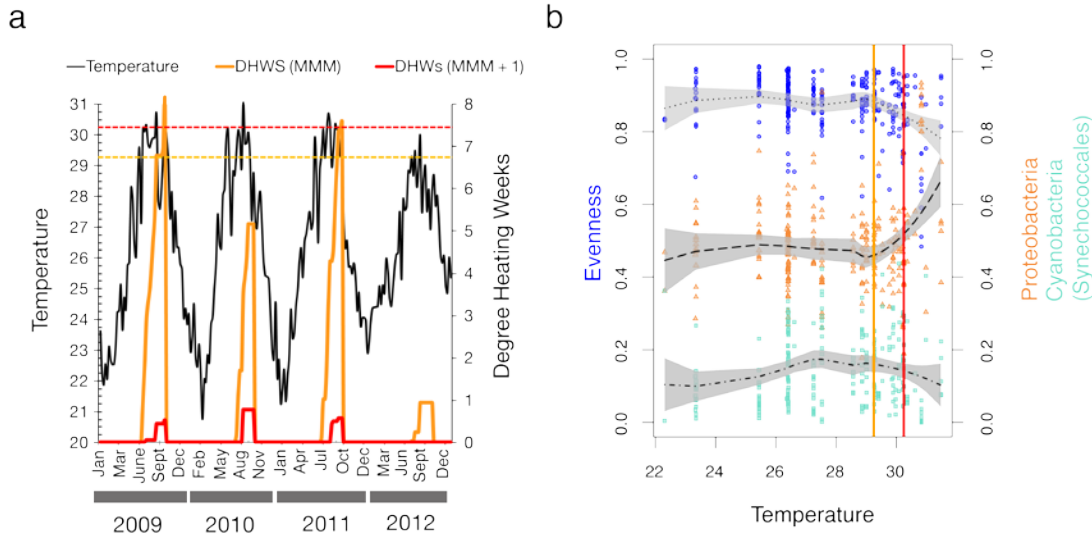

179  
 180 **Supplementary Figure 10. Temperature, thermal stress, and effects on the coral**  
 181 **microbiome. a**, Temperature time-series based on the Pathfinder V5.2 dataset (Methods).  
 182 The left vertical axis and thin solid black lines shows temperatures in °C. The horizontal  
 183 orange dotted line indicate the maximum monthly mean (MMM) temperature of 29.26  
 184 °C. This is calculated as the average temperature of the warmest month in available  
 185 climatological data (1982-2008; i.e. excluding the study period). The red horizontal  
 186 dotted line indicates the MMM + 1 °C (30.26 °C), which is often used as a temperature  
 187 threshold at which coral thermal stress begins to accumulate in predictions of coral  
 188 bleaching. For purposes of predicting coral bleaching, coral thermal stress is typically  
 189 measured in units of Degree Heating Weeks (DHWs, °C-weeks). DHWs are usually  
 190 calculated relative to the MMM + 1 °C, and are the accumulation of temperatures above  
 191 this threshold. As a hypothetical example, if temperatures exceeded the MMM + 1 by 0.2  
 192 °C for 3 weeks, 0.6 DHWs would accumulate. The accumulation of degree heating weeks  
 193 due to temperatures above the MMM + 1 °C is shown by the solid red line and the  
 194 secondary vertical axis on the right hand side of the plot (DHWs (MMM + 1)). Because  
 195 vulnerability to pathogenic bacteria is thought to occur at lower levels of thermal stress  
 196 than coral bleaching, we also plotted DHWs calculated relative to the MMM. This is  
 197 shown by the orange line (DHWs (MMM)). We emphasize that all DHW values  
 198 presented in the main text are calculated based on the MMM + 1 °C (red lines). **b**, Coral  
 199 microbiomes vs. temperature. Microbial community evenness (left axis, blue circles) and  
 200 the relative abundance of *Proteobacteria* and *Synechococcus* cyanobacteria (right axis,  
 201 orange triangles and cyan squares, respectively). The x-axis shows sea-surface  
 202 temperatures. Regression lines show the loess regression (span = 0.25) for each data  
 203 series (evenness, dotted lines; *Proteobacteria*, dashed line; *Synechococcus* dot-dashed  
 204 line). Gray shading around each line indicates twice the standard error of the regression.  
 205 Vertical lines indicate metrics from the thermal stress calculation. The orange vertical  
 206 line is the MMM, the red one is the MMM + 1 °C. Notably, the abundance of  
 207 *Proteobacteria* increase, and overall community evenness decrease around the MMM of  
 208 29.26 °C.



| Taxonomy (Microbial Order)                           | Percent Change in Relative Abundance Compared to Control |           |                      |
|------------------------------------------------------|----------------------------------------------------------|-----------|----------------------|
|                                                      | Nutrient                                                 | Exclosure | Exclosure & Nutrient |
| Archaea Crenarchaeota Thaumarchaeota Cenarchaeales   | -20.79%                                                  | 61.83%    | 0.78%                |
| Acidobacteria Sva0725 Sva0725                        | 4.75%                                                    | 111.13%   | 45.47%               |
| Bacteroidetes Bacteroidia Bacteroidales              | -19.33%                                                  | 41.36%    | 9.40%                |
| Bacteroidetes Flavobacteriia Flavobacteriales        | -3.31%                                                   | 29.07%    | 22.62%               |
| Chlamydiae Chlamydiia Chlamydiales                   | 49.44%                                                   | 149.04%   | 60.60%               |
| Cyanobacteria Synechococcophycideae Synechococcales  | 5.42%                                                    | -22.24%   | -21.25%              |
| Fusobacteria Fusobacteriia Fusobacteriales           | -19.08%                                                  | 39.01%    | -16.80%              |
| Gemmatimonadetes Gemm-2                              | 31.21%                                                   | 142.33%   | 102.66%              |
| Lentisphaeraec Lentisphaeria Lentisphaerales         | -16.45%                                                  | 32.89%    | 30.42%               |
| Planctomycetes BD7-11                                | -32.83%                                                  | 125.51%   | -17.17%              |
| Planctomycetes C6od113                               | -17.83%                                                  | 107.33%   | 41.01%               |
| Planctomycetes OM190 agg27                           | -4.80%                                                   | 58.00%    | 21.55%               |
| Planctomycetes Planctomycetia Pirellulales           | -10.75%                                                  | 70.81%    | 11.03%               |
| Proteobacteria Alphaproteobacteria Rhodospirillales  | -17.96%                                                  | 54.61%    | 86.92%               |
| Proteobacteria Alphaproteobacteria Rickettsiales     | 83.04%                                                   | 14.69%    | -5.89%               |
| Proteobacteria Deltaproteobacteria Myxococcales      | -6.81%                                                   | 28.66%    | 13.02%               |
| Proteobacteria Deltaproteobacteria NB1-j             | -3.92%                                                   | 109.96%   | 67.54%               |
| Proteobacteria Deltaproteobacteria Spirobacillales   | -6.86%                                                   | 43.69%    | 22.35%               |
| Proteobacteria Gammaproteobacteria Chromatiales      | -32.93%                                                  | 40.63%    | -5.00%               |
| Proteobacteria Gammaproteobacteria HOC36             | -5.57%                                                   | 5.91%     | 65.07%               |
| Proteobacteria Gammaproteobacteria Marinicellales    | -15.52%                                                  | 23.66%    | 18.56%               |
| Proteobacteria Gammaproteobacteria Thiohalorhabdales | -45.08%                                                  | 17.75%    | -7.73%               |
| Proteobacteria Gammaproteobacteria Thiotrichales     | -15.76%                                                  | 37.10%    | 11.54%               |
| Proteobacteria Gammaproteobacteria; Alteromonadales  | 12.96%                                                   | -6.25%    | -6.25%               |
| Spirochaetes Spirochaetes Spirochaetales             | 0.60%                                                    | 111.06%   | 18.23%               |

| Positive  | Negative    |
|-----------|-------------|
| >100%     | 0 to -15%   |
| 50 to 99% | -16 to 30%  |
| 0 to 49%  | -31 to -50% |

209 **Supplementary Table 1. Response of microbial orders to treatment.**

210 Table reports microbial orders that were significantly different (Kruskal-Wallis, FDR  $q \leq$   
211 0.05) across treatments. Values report percent changes compared to corals in control  
212 plots. Cold colors are reductions compared to controls and hot colors represent increases  
213 compared to controls. In general, corals in herbivore exclosures had large elevations in  
214 many taxa as compared to controls while nutrient pollution caused small to moderate  
215 reductions in various taxa. The Taxonomy column gives phylum, class, and order based  
216 on Greengenes taxonomy.

217

218 **Supplementary Notes**

219

220 **Natural history of the study site**

221 This experiment was conducted in the area of Pickles Reef (N 24.99430, W  
222 80.40650), located east of Key Largo, Florida in the United States. The Florida Keys reef  
223 tract consists of a large bank reef system located approximately 8 km offshore of the  
224 Florida Keys, USA, and paralleling the island chain. Our study reef is a 5-6 m deep spur  
225 and groove reef system within this reef tract. The reefs of the Florida Keys have robust  
226 herbivorous fish populations<sup>1</sup> and are relatively oligotrophic<sup>2</sup>. Coral cover on most reefs  
227 in the Florida Keys, including our site, is 5-10%, while macroalgal cover averages ~15%,  
228 but ranges from 0-70% depending on location and season<sup>3-5</sup>. Parrotfishes (*Scaridae*) and  
229 surgeonfishes (*Acanthuridae*) are the dominant herbivores on these reefs as fishing for  
230 them was banned in 1981. The other important herbivore on Caribbean reefs, the urchin  
231 *Diadema antillarum*, remains at low densities across the Florida Keys following the mass  
232 mortality event in 1982-3<sup>6</sup>.

233

234 **Tests of the experimental design and implementation**

235 *Nutrient enrichment in seawater and algal tissue samples*

236 Sampling of water column nutrients showed that enrichment increased both  
237 dissolved inorganic nitrogen (3.91  $\mu\text{M}$  vs. 1.15  $\mu\text{M}$  in enriched vs. control) and soluble  
238 reactive phosphorus (0.27  $\mu\text{M}$  vs. 0.035  $\mu\text{M}$  in enriched vs. control) in the water column<sup>7</sup>.  
239 Levels of both DIN and SRP in the control plots were within the range of concentrations  
240 for offshore reefs, as measured in a 15-year water-monitoring program in the Florida  
241 Keys<sup>8</sup>. Levels of DIN and SRP in the enriched treatment were similar to those reported  
242 from other anthropogenically-impacted reefs located around the world<sup>9</sup>. Additionally,  
243 nitrogen concentrations in the tissues of the common alga *Dictyota menstrualis* were 20%  
244 higher in the enriched plots compared to the control plots, suggesting that the nutrients  
245 from the enrichment were consistently available to benthic organisms<sup>7</sup>.

246

247 *Herbivorous fish community assessments*

248 Herbivorous fish biomass averaged  $50.9 \pm 5.7 \text{ g/m}^2$  over the course of our sampling,  
249 which is among the higher values seen across the Caribbean<sup>10,11</sup>. There were no  
250 differences in biomass across different sampling periods (ANOVA:  $F = 0.23$ ,  $p = 0.880$ ).  
251 On average, parrotfishes and surgeonfishes represented 55% and 45% of total  
252 herbivorous fish biomass respectively. We did not quantify *D. antillarum* as they were  
253 rarely encountered.

254

255 *Tests for unintended experimental enclosure effects*

256 One potential concern with using enclosures to manipulate herbivore access is that  
257 they can potentially alter water flow regimes or sedimentation inside of the full  
258 enclosures, creating experimental artifacts in patterns of algal community structure. We  
259 saw no differences between full enclosures, enclosure controls, or open areas for either  
260 sedimentation rates measured via sediment traps (e.g. <sup>12</sup>; one-way ANOVA,  $F = 0.37$ ,  $p =$   
261  $0.70$ ) or for bulk flow rates measured via clod cards (e.g. <sup>13</sup>; one-way ANOVA,  $F = 3.01$ ,  
262  $p = 0.10$ ). Enclosures were scrubbed every 4-6 weeks to minimize growth of fouling  
263 organisms and minimize changes in flow. However, these enclosures do decrease light

264 availability to the benthos by 15% (e.g. <sup>14</sup>). Given that the light availability common at  
265 these shallow depths saturates the photosystems of primary producers<sup>15</sup>, the slight  
266 decrease in light availability likely had minimal impact on primary production or  
267 interactions among benthic organisms.

268 Further, we saw no differences in damselfish densities (primarily the bicolor  
269 damselfish *Stegastes partitus*) between exclosures vs. exclosure controls (one-way  
270 ANOVA,  $F = 0.43$ ,  $p = 0.54$ ) or between enriched vs. ambient nutrient plots (one-way  
271 ANOVA,  $F = 0.16$ ,  $p = 0.71$ ). Thus, these territorial and aggressive fishes that can impact  
272 how larger herbivorous fishes feed (e.g. <sup>16</sup>) likely did not differently affect the  
273 treatments. Further, we are confident that our treatments imparted minimal caging  
274 artifacts as others have shown minimal artifacts from using similar designs (e.g. <sup>17-20</sup>).

275

## 276 **Benthic community surveys**

### 277 *Shifts in algal community composition*

278 Increases in total algal cover corresponded to alterations in algal community  
279 composition (Supplementary Figure 2a,b). Control plots were marked by high  
280 abundances of closely cropped filamentous turf algae and crustose coralline algae. On  
281 healthy reefs a high abundance of these two algal functional groups, along with low  
282 abundance of macroalgae, makes for productive reefs and prime habitat for coral  
283 recruitment, growth, and reproduction<sup>21</sup>. Nutrient pollution and/or herbivore exclusion  
284 decreased cover of both of these groups while also increasing the abundance of algae that  
285 can be harmful to corals. Herbivore exclusion in general led to increases in several  
286 groups of algae, such as *Sargassum* spp., *Amphiroa* spp., tall filamentous turf, *Dictyota*  
287 spp., and *Halimeda* spp., known to both harm corals in direct competition<sup>22,23</sup> and  
288 strongly impact the coral microbiome<sup>23-25</sup>. Nutrient enrichment also increased the  
289 abundance of important algal competitors such as *Dictyota* spp., tall filamentous turf, and  
290 *Lyngbia* spp. cyanobacteria, which are noted for producing chemicals harmful to corals  
291 and their microbes<sup>26</sup>.

292

## 293 **Microbial community analysis**

### 294 *Results of coral microbiome function prediction*

295 When we assessed predicted microbiome function in response to algal abundance,  
296 76 functional categories were significantly correlated with upright algal cover (Pearson  
297 correlation, FDR  $q < 0.05$ ), with correlation coefficients ranging from -0.23 to 0.18  
298 (Supplementary Figure 5a, Supplementary Data 4a). High levels of macroalgae increased  
299 functional categories associated with opportunism (Bacterial Invasion of Epithelial Cells,  
300 Bacterial Motility Proteins, Bacterial Chemotaxis, Cell Motility and Secretion), and  
301 decreased the abundance of pathways involved in antibiotic production (here the single  
302 category tetracycline biosynthesis). The strongest single correlate of increased algal cover  
303 was a predicted decrease in microbial genes for linoleic acid (C18:2, *cis-cis*-9,12)  
304 metabolism.

305 Extremes of temperature significantly altered the predicted abundance of 124 KEGG  
306 Pathways (Pearson correlation,  $p < 0.05$ , FDR  $q < 0.05$ ). Extremes of temperature  
307 increased the predicted genomic abundance of pathways for bacterial chemotaxis,  
308 motility, environmental sensing and secretion often observed to increase with  
309 opportunism (Supplementary Figure 5b, Supplementary Table 4b). Previous work has

310 shown that elevated temperature increases DMSP release from the coral holobiont, which  
311 in turn guides chemotaxis by several marine microorganisms<sup>27</sup>, including the coral  
312 pathogen *Vibrio corallyticus*, to the coral surface<sup>28</sup>.

313 Conversely, five categories of antibiotic/antimicrobial production decreased in  
314 extreme temperature (Novobiocin biosynthesis, Streptomycin biosynthesis, isoquinoline  
315 alkaloid biosynthesis, Biosynthesis of vancomycin group antibiotics, Tetracycline  
316 biosynthesis), as did several pathways associated with photosynthesis (Photosynthesis  
317 proteins, photosynthesis- antennae proteins, carbon fixation in photosynthetic organisms,  
318 porphyrin and chlorophyll metabolism). These changes may reflect shifts from a  
319 community rich in phototrophs (*Synechococcus*) and defensive symbionts (e.g.  
320 *Actinobacteria*) to one more strongly dominated by a variety of mostly proteobacterial  
321 opportunists.

322

323 *Comparison of predicted functional profiles for corals under a range of temperatures*  
324 *with metagenomic data from laboratory temperature manipulations*

325 KEGG categories associated with increasing temperature in the present study tended  
326 to change in the same direction as observed in Vega Thurber *et al.*, 2009<sup>29</sup>. These  
327 commonalities were striking given that one data set represents genome-based predictions  
328 from field 16S rRNA data, while the other represents pooled metagenomes from a  
329 laboratory experiment. To quantify these trends we used sign tests to compare the  
330 direction of change with temperature for the 24 level 3 KEGG functional categories that  
331 changed by >1% with elevated temperature in Vega Thurber *et al.*, 2009. We compared  
332 these categories with either: a) the set of 13 KEGG categories significantly associated  
333 with temperature in this study (dropping pathways that did not significantly change here)  
334 or b) all 24 KEGG categories enriched by temperature in the previous study.

335 Regardless of the method used, KEGG categories showed a significant tendency to  
336 change in the same direction with temperature. Among the set of all 24 KEGG pathways  
337 increased by temperature in Vega Thurber 2009, 17 of 24 changed in the same direction  
338 in this study. Thus, the direction of change with temperature was significant overall  
339 between these two very different experiments (one-sided sign test, 17 successes, 24 trials,  
340  $p = 0.032$ ). The 13 KEGG Pathways that changed by >1% in Vega Thurber 2009 and also  
341 changed significantly in this study (Pearson correlation, FDR  $q < 0.05$ ) also had a  
342 significant tendency to change in the same direction (one sided sign test, 10 trials, 13  
343 successes,  $p = 0.046$ ).

344

345 *Confirmation of macroalgal contact as a driver of microbial beta diversity*

346 To confirm that direct macroalgal contact was the driver of changes in the microbial  
347  $\beta$ -diversity seen in this work, we reanalyzed data from a previous experiment<sup>23</sup> at the  
348 same study site that placed replicate *Porites* corals in contact with macroalgae. Three  
349 categories from that experiment were compared: corals alone, algae alone, or corals in  
350 competition with algae (Supplementary Figure 7c). Corals in contact with macroalgae  
351 showed higher  $\beta$ -diversity than corals without macroalgae (Bonferroni-corrected  
352 permutational t-test,  $p = 0.009$ ).  $\beta$ -diversity in corals in contact with macroalgae was also  
353 greater than for the algae themselves (Bonferroni-corrected permutational t-test,  $p =$   
354  $0.003$ ).

355

356 *Effects of algal competition on microbial beta-diversity within coral genera*

357 To test whether increasing  $\beta$ -diversity with algal competition is a consistent feature  
358 of the coral genera in our study, the effects of algal competition on microbial  $\beta$ -diversity  
359 was assessed within each coral genus. In each case, mean microbial community  $\beta$ -  
360 diversity was greater when corals were in competition with macroalgae, although when  
361 *Porites* was considered alone this difference was not significant (permutational t-tests;  
362 *Agaricia*,  $p = 0.006$ ; *Siderastrea*,  $p = 0.005$ , *Porites*  $p = 0.74$ ). However, the variability  
363 imparted to *Porites* microbiomes from parrotfish bites and nutrient enrichment could  
364 have confounded the impact of macroalgae. Similarly, competition with *Dictyota* algae  
365 significantly increased microbial  $\beta$ -diversity in all coral genera (*Agaricia*  $p = 0.001$ ;  
366 *Siderastrea*  $p = 0.001$ ; *Porites*  $p = 0.002$ ). These findings do not exclude the likely  
367 possibility that the microbes associated with many coral genera have partially species-  
368 specific interactions with particular algae.

369

370 *Comparison of temperature vs. seasonal effects on microbial beta diversity*

371 Temperature was an important correlate of many aspects of microbial community  
372 structure. Because temperature was not experimentally manipulated, and many other  
373 oceanographic parameters fluctuate seasonally, we sought to test whether apparent  
374 changes in temperature might be due to unrelated seasonal changes.

375 We first tested whether temperature increased microbial  $\beta$ -diversity within seasons  
376 as well as between seasons. We reasoned that if overall seasonal changes drove microbial  
377  $\beta$ -diversity, and correlations with temperature were an incidental byproduct, then within-  
378 season effects of temperature on microbial  $\beta$ -diversity should be weak or non-existent.  
379 Instead, we found that even within summer and fall samples (considered separately), high  
380 temperatures ( $>30$  °C) resulted in greater  $\beta$ -diversity than non-stressful temperatures (24-  
381 29 °C), indicating that thermal stress influences microbial communities within as well as  
382 between seasons (Summer:  $p = 0.001$ , permutational t-test; Fall  $p = 0.001$ , permutational  
383 t-test). Consistent with either warm or cold temperatures disrupting coral microbiomes,  
384 low ( $< 24$  °C) temperatures in winter were associated with significantly greater  $\beta$ -  
385 diversity than 24-29 °C winter samples ( $p = 0.003$ , permutational t-test).

386 To address the possibility that some other seasonal environmental factor besides  
387 short-term temperature changes might be the main driver of microbial  $\beta$ -diversity, we  
388 examined 40 environmental parameters measured seasonally by the SERC Water Quality  
389 Monitoring Network in South Florida, including dissolved inorganic nitrogen, total  
390 organic carbon, chlorophyll a, turbidity,  $\text{SiO}_2$ , etc. (Supplemental Data 3k). To test  
391 whether differences in these parameters might explain microbial  $\beta$ -diversity, we  
392 constructed Euclidean distance matrices for each parameter across samples, and used  
393 Mantel tests, a permutational procedure for comparing two distance matrices, to test  
394 whether any of these environmental parameters significantly correlated with microbial  $\beta$ -  
395 diversity. No correction for multiple comparisons was performed in this instance, since  
396 we did not wish to miss a relevant parameter that might falsify our interpretation of the  
397 role of temperature.

398 Among the measured parameters and temperature, only three correlated significantly  
399 with microbial  $\beta$ -diversity. Daily temperature had the greatest influence ( $r = 0.127$ ,  $p =$   
400  $0.01$ ), with surface measurements of total organic carbon (TOC;  $r = 0.045$ ,  $p = 0.02$ ), and  
401 turbidity ( $r = 0.09$ ,  $p = 0.04$ ) playing secondary roles. Notably, although daily

402 temperature measurements (HCOM\_temp\_0m\_degrees) were well correlated with  
403 microbial community structure, seasonal temperature measurements (collected by SERC  
404 quarterly at a single time point per season) were not (SERC\_TEMP\_B). This may  
405 indicate that short-term changes in temperature are important, above and beyond typical  
406 seasonal temperature trends.

407 A final possibility that we considered was that the apparent effects of temperature on  
408  $\beta$ -diversity might be explained by the relatively modest seasonal variation in upright algal  
409 cover (which includes both tall turf algae and macroalgae). To disentangle the effects of  
410 temperature from upright algal cover on microbial  $\beta$ -diversity, we conducted a partial  
411 Mantel test examining the relationship between temperature and microbial  $\beta$ -diversity  
412 while normalizing for the effect of upright algal cover. We found that temperature was  
413 still significantly correlated with  $\beta$ -diversity (Partial Mantel test;  $r = 0.12$   $p = 0.01$ ) after  
414 accounting for the effects of upright algal cover (Supplemental Data 3k).

415 We do not interpret these results to mean that temperature is the only influence on  
416 microbial communities. For example, oceanographic parameters not significant on a  
417 quarterly basis may have important short-term or spatially localized effects that could be  
418 uncovered with high-resolution sampling. However, these results taken together argue  
419 against the possibility that the observed correlations between temperature and microbial  
420 community structure are artifacts of seasonal fluctuations in water chemistry or algal  
421 cover. Instead, short-term temperature variation appears to be an important factor  
422 influencing coral microbiome stability. This analysis also identified seasonal variation in  
423 dissolved organic carbon and turbidity as additional influences on coral microbial  
424 community structure, consistent with the effects of these parameters on corals and coral  
425 microbiomes in laboratory experiments<sup>30,31</sup>.

427 **SUPPLEMENTARY REFERENCES**

- 428 1 Burkepile, D. E. *et al.* Nutrient supply from fishes facilitates macroalgae and  
 429 suppresses corals in a Caribbean coral reef ecosystem. *Sci Rep* **3**, 1493,  
 430 doi:10.1038/srep01493 (2013).
- 431 2 Briceno, H. O. B., J. N. . Annual report of the water quality monitoring project for  
 432 the water quality protection program of the Florida Keys National Marine  
 433 Sanctuary (Southeast Environmental Research Center, Florida International  
 434 University, <http://serc.fiu.edu/wqmnetwork/> 2012).
- 435 3 Paddock, M., Cowen, R. & Sponaugle, S. Grazing pressure of herbivorous coral  
 436 reef fishes on low coral-cover reefs. *Coral Reefs* **25**, 461-472,  
 437 doi:10.1007/s00338-006-0112-y (2006).
- 438 4 Schutte, V. G., Selig, E. R. & Bruno, J. F. Regional spatio-temporal trends in  
 439 Caribbean coral reef benthic communities. *Mar Ecol Prog Ser* **402**, 115-122  
 440 (2010).
- 441 5 Maliao, R., Turingan, R. & Lin, J. Phase-shift in coral reef communities in the  
 442 Florida Keys National Marine Sanctuary (FKNMS), USA. *Mar Biol* **154**, 841-  
 443 853, doi:10.1007/s00227-008-0977-0 (2008).
- 444 6 Chiappone, M., Swanson, D. W. & Miller, S. L. Density, spatial distribution and  
 445 size structure of sea urchins in Florida Keys coral reef and hard-bottom habitats.  
 446 *Mar Ecol Prog Ser* **235**, 117-126 (2002).
- 447 7 Vega Thurber, R. *et al.* Chronic nutrient enrichment increases prevalence and  
 448 severity of coral disease and bleaching *Global Change Biology* **20**, 544-554,  
 449 doi:10.1111/gcb.12450 (2014).
- 450 8 Briceno, H. O. & Boyer, J. N. Annual report of the water quality monitoring  
 451 project for the water quality protection program of the Florida Keys National  
 452 Marine Sanctuary *Southeast Environmental Research Center, Florida*  
 453 *International University*, 82 <http://serc.fiu.edu/wqmnetwork/> (2012).
- 454 9 Dinsdale, E. A. *et al.* Microbial Ecology of Four Coral Atolls in the Northern Line  
 455 Islands. *PloS one* **3**, -, doi:ARTN e1584  
 456 DOI 10.1371/journal.pone.0001584 (2008).
- 457 10 Burkepile, D. E. *et al.* Nutrient supply from fishes facilitates macroalgae and  
 458 suppresses corals in a Caribbean coral reef ecosystem. *Scientific Reports* **3**,  
 459 doi:10.1038/srep01493 (2013).
- 460 11 Newman, M. J. H., Paredes, G. A., Sala, E. & Jackson, J. B. C. Structure of  
 461 Caribbean coral reef communities across a large gradient of fish biomass. *Ecology*  
 462 *Letters* **9**, 1216-1227 (2006).
- 463 12 Gleason, D. Sedimentation and distributions of green and brown morphs of the  
 464 Caribbean coral *Porites astreoides* Lamarck. *Journal of Experimental Marine*  
 465 *Biology and Ecology* **230**, 73-89 (1998).
- 466 13 Jokiel, P. L. & Morrissey, J. I. Water motion on coral reefs - evaluation of the  
 467 clod card technique. *Marine Ecology-Progress Series* **93**, 175-181 (1993).
- 468 14 Ferrari, R., Gonzalez-Rivero, M., Ortiz, J. C. & Mumby, P. J. Interaction of  
 469 herbivory and seasonality on the dynamics of Caribbean macroalgae. *Coral Reefs*  
 470 **31**, 683-692, doi:10.1007/s00338-012-0889-9 (2012).

- 471 15 Carpenter, R. C. Relationships between primary production and irradiance in  
472 coral reef algal communities. *Limnology and Oceanography* **30**, 784-793 (1985).
- 473 16 Hixon, M. A. & Bronstoff, W. N. Damselfish as keystone species in reverse:  
474 intermediate disturbance and diversity of reef algae. *Science* **220**, 511-513 (1983).
- 475 17 Smith, J., Smith, C. & Hunter, C. An experimental analysis of the effects of  
476 herbivory and nutrient enrichment on benthic community dynamics on a  
477 Hawaiian reef. *Coral Reefs* **19**, 332-342 (2001).
- 478 18 Burkepille, D. & Hay, M. Predator release of the gastropod *Cyphoma gibbosum*  
479 increases predation on gorgonian corals. *Oecologia* **154**, 167-173 (2007).
- 480 19 Miller, M. & Hay, M. Effects of fish predation and seaweed competition on the  
481 survival and growth of corals. *Oecologia* **113**, 231-238 (1998).
- 482 20 Miller, M. *et al.* Effects of nutrients versus herbivores on reef algae: A new  
483 method for manipulating nutrients on coral reefs. *Limnology and Oceanography*  
484 **44**, 1847-1861 (1999).
- 485 21 Birrell, C. L., McCook, L. J., Willis, B. L. & Diaz-Pulido, G. A. Effects of  
486 benthic algae on the replenishment of corals and the implications for the resilience  
487 of coral reefs. *Oceanography and Marine Biology: An Annual Review* **46**, 25-63  
488 (2008).
- 489 22 Rasher, D. B. & Hay, M. E. Chemically rich seaweeds poison corals when not  
490 controlled by herbivores. *Proceedings of the National Academy of Science* **107**,  
491 9683-9688 (2010).
- 492 23 Vega Thurber, R. *et al.* Macroalgae Decrease Growth and Alter Microbial  
493 Community Structure of the Reef-Building Coral, *Porites astreoides*. *PloS one* **7**,  
494 e44246 (2012).
- 495 24 Smith, J. E. *et al.* Indirect effects of algae on coral: algae-mediated, microbe-  
496 induced coral mortality. *Ecology Letters* **9**, 835-845 (2006).
- 497 25 Morrow, K. M., Liles, M. R., Paul, V. J., Moss, A. & Chadwick, N. E. Bacterial  
498 shifts associated with coral-macroalgal competition in the Caribbean Sea. *Mar*  
499 *Ecol Prog Ser* **488**, 103-117 (2013).
- 500 26 Morrow, K. M., Paul, V. J., Liles, M. R. & Chadwick, N. E. Allelochemicals  
501 produced by Caribbean macroalgae and cyanobacteria have species-specific  
502 effects on reef coral microorganisms. *Coral Reefs* **30**, 309-320,  
503 doi:10.1007/s00338-011-0747-1 (2011).
- 504 27 Seymour, J. R., Simo, R., Ahmed, T. & Stocker, R. Chemoattraction to  
505 dimethylsulfoniopropionate throughout the marine microbial food web. *Science*  
506 **329**, 342-345, doi:10.1126/science.1188418 (2010).
- 507 28 Garren, M. *et al.* A bacterial pathogen uses dimethylsulfoniopropionate as a cue  
508 to target heat-stressed corals. *The ISME Journal* **8**, 999-1007,  
509 doi:10.1038/ismej.2013.210 (2013).
- 510 29 Thurber, R. V. *et al.* Metagenomic analysis of stressed coral holobionts.  
511 *Environmental Microbiology* **11**, 2148-2163 (2009).
- 512 30 Kuntz, N. M., Kline, D. I., Sandin, S. A. & Rohwer, F. Pathologies and mortality  
513 rates caused by organic carbon and nutrient stressors in three Caribbean coral  
514 species. *Mar Ecol Prog Ser* **294**, 173-180, doi:10.3354/meps294173 (2005).



515 31 Kline, D. I., Kuntz, N. M., Breitbart, M., Knowlton, N. & Rohwer, F. Role of  
516 elevated organic carbon levels and microbial activity in coral mortality. *Mar Ecol*  
517 *Prog Ser* **314**, 119-125 (2006).  
518
